# Supplementary material for: Use and Safety of Anthroposophic Medicinal Products: An Analysis of 44,662 Patients from the EvaMed Pharmacovigilance Network
Source: PubMed Central journal article supplement — Drugs Real World Outcomes. 2017 Sep 30;4(4):199–213. doi: 10.1007/s40801-017-0118-5 (PMC5684047; doi:10.1007/s40801-017-0118-5), 2017-09-30
Supplement: 40801_2017_118_MOESM1_ESM.pdf [file 40801_2017_118_MOESM1_ESM.pdf]

## Online Resources 1-7

**Article title:** Use and safety of anthroposophic medicinal products, An analysis of 44,662 patients from the EvaMed Pharmacovigilance Network

**Author names:** Harald Johan Hamre, Anja Glockmann, Kirsten Heckenbach, Harald Matthes

**Affiliation and e-mail address of the corresponding author:** Harald Johan Hamre, Institute for Applied Epistemology and Medical Methodology at the University of Witten/Herdecke, [harald.hamre@ifaemm.de](mailto:harald.hamre@ifaemm.de)

## Online Resource 1 Categories and criteria for causality assessment of adverse events and drugs. Uppsala Monitoring Centre, WHO Collaborating Centre for International Drug Monitoring

| Causality term                   | Assessment criteria (all points should be reasonably complied with)                                                                                                                                                                                                                                                                                                                                                                                                                                   |
|----------------------------------|-------------------------------------------------------------------------------------------------------------------------------------------------------------------------------------------------------------------------------------------------------------------------------------------------------------------------------------------------------------------------------------------------------------------------------------------------------------------------------------------------------|
| Certain                          | <ul style="list-style-type: none"> <li>• Event or laboratory test abnormality, with plausible time relationship to drug intake</li> <li>• Cannot be explained by disease or other drugs</li> <li>• Response to withdrawal plausible (pharmacologically, pathologically)</li> <li>• Event definitive pharmacologically or phenomenologically (i.e. an objective and specific medical disorder or a recognised pharmacological phenomenon)</li> <li>• Rechallenge satisfactory, if necessary</li> </ul> |
| Probable / Likely                | <ul style="list-style-type: none"> <li>• Event or laboratory test abnormality, with reasonable time relationship to drug intake</li> <li>• Unlikely to be attributed to disease or other drugs</li> <li>• Response to withdrawal clinically reasonable</li> <li>• Rechallenge not required</li> </ul>                                                                                                                                                                                                 |
| Possible                         | <ul style="list-style-type: none"> <li>• Event or laboratory test abnormality, with reasonable time relationship to drug intake</li> <li>• Could also be explained by disease or other drugs</li> <li>• Information on drug withdrawal may be lacking or unclear</li> </ul>                                                                                                                                                                                                                           |
| Unlikely                         | <ul style="list-style-type: none"> <li>• Event or laboratory test abnormality, with a time to drug intake that makes a relationship improbable (but not impossible)</li> <li>• Disease or other drugs provide plausible explanations</li> </ul>                                                                                                                                                                                                                                                       |
| Conditional /<br>Unclassified    | <ul style="list-style-type: none"> <li>• Event or laboratory test abnormality</li> <li>• More data for proper assessment needed, or</li> <li>• Additional data under examination</li> </ul>                                                                                                                                                                                                                                                                                                           |
| Unassessable /<br>Unclassifiable | <ul style="list-style-type: none"> <li>• Report suggesting an adverse reaction</li> <li>• Cannot be judged because information is insufficient or contradictory</li> <li>• Data cannot be supplemented or verified</li> </ul>                                                                                                                                                                                                                                                                         |

*Cited from: The use of the WHO-UMC system for standardised case causality assessment. Uppsala Monitoring Centre (accessed 28 August 2017).*

**Online Resource 2 List of adverse drug reactions to anthroposophic medicinal products**

| Patient |       | Adverse drug reaction |                |                 |              |                | Symptom 1                                                        |                | Symptom 2                                                 |                                  | Symptoms 3-5 |
|---------|-------|-----------------------|----------------|-----------------|--------------|----------------|------------------------------------------------------------------|----------------|-----------------------------------------------------------|----------------------------------|--------------|
| Sex     | Age y | Dura-<br>tion d       | Inten-<br>sity | Mana-<br>gement | Out-<br>come | MedDRA<br>Code | Text                                                             | MedDRA<br>Code | Text                                                      | <i>A-M listed<br/>underneath</i> |              |
| f       | 51    | 103                   | II             | 3               | 1            | 10000060       | Flatulence, bloating and distension                              |                |                                                           |                                  |              |
| f       | 57    | ND                    | II             | 1               | 1            | 10000087       | Gastrointestinal and abdominal pains (excl oral and throat)      |                |                                                           |                                  |              |
| m       | 11    | 4                     | I              | 1               | 1            | 10000087       | Gastrointestinal and abdominal pains (excl oral and throat)      |                |                                                           |                                  |              |
| f       | 51    | 17                    | II             | 1               | 1            | 10000133       | Faecal abnormalities NEC                                         |                |                                                           |                                  |              |
| m       | 12    | 23                    | II             | 1               | 1            | 10001488       | Behaviour and socialisation disturbances                         |                |                                                           |                                  |              |
| f       | 86    | 16                    | I              | 1               | 1            | 10001488       | Behaviour and socialisation disturbances                         |                |                                                           |                                  |              |
| f       | 1     | 5                     | I              | 1               | 1            | 10001488       | Behaviour and socialisation disturbances                         |                |                                                           |                                  |              |
| m       | 2     | 1                     | I              | 1               | 1            | 10001497       | Anxiety symptoms                                                 |                |                                                           |                                  |              |
| f       | 63    | 59                    | II             | 1               | 1            | 10001854       | Disturbances in consciousness NEC                                |                |                                                           |                                  |              |
| f       | 65    | 6                     | II             | 2               | 1            | 10003041       | Application and instillation site reactions                      |                |                                                           |                                  |              |
| f       | 51    | 7                     | I              | 1               | 1            | 10003246       | Arthropathies NEC                                                |                |                                                           |                                  |              |
| f       | 74    | ND                    | II             | 3               | 2            | 10005034       | Bladder and urethral symptoms                                    |                |                                                           |                                  |              |
| m       | 29    | 1                     | II             | 1               | 1            | 10005148       | Lid, lash and lacrimal infections, irritations and inflammations | 10010725       | Conjunctival infections, irritations and inflammations    |                                  |              |
| f       | 67    | 1                     | I              | 1               | 1            | 10006789       | Paraesthesias and dysaesthesias                                  |                |                                                           |                                  |              |
| f       | 50    | 5                     | I              | 4               | 1            | 10008469       | Pain and discomfort NEC                                          |                |                                                           |                                  |              |
| f       | 2     | 4                     | II             | 1               | 1            | 10010774       | Gastrointestinal atonic and hypomotility disorders NEC           |                |                                                           |                                  |              |
| m       | 8     | 2                     | I              | 1               | 2            | 10011224       | Coughing and associated symptoms                                 |                |                                                           |                                  |              |
| f       | 46    | 43                    | II             | 1               | 1            | 10012378       | Depressive disorders                                             | 10016256       | Asthenic conditions                                       |                                  |              |
| f       | 54    | 1                     | II             | 1               | 1            | 10012735       | Diarrhoea (excl infective)                                       | 10033557       | Cardiac signs and symptoms NEC                            | A                                |              |
| f       | 84    | 85                    | I              | 1               | 1            | 10012735       | Diarrhoea (excl infective)                                       | 10036018       | Bladder and urethral symptoms                             |                                  |              |
| f       | 72    | 46                    | III            | 2               | 1            | 10013573       | Neurological signs and symptoms NEC                              | 10061224       | Musculoskeletal and connective tissue pain and discomfort | B                                |              |

|    |    |    |     |   |   |          |                                                                |          |                                        |       |
|----|----|----|-----|---|---|----------|----------------------------------------------------------------|----------|----------------------------------------|-------|
| f  | 92 | 1  | II  | 1 | 1 | 10013573 | Neurological signs and symptoms NEC                            | 10020772 | Vascular hypertensive disorders<br>NEC |       |
| f  | 2  | 9  | II  | 1 | 1 | 10013687 | Dermatitis ascribed to specific agent                          |          |                                        |       |
| m  | 2  | 3  | I   | 1 | 1 | 10013687 | Dermatitis ascribed to specific agent                          |          |                                        |       |
| f  | 2  | 2  | II  | 1 | 1 | 10013687 | Dermatitis ascribed to specific agent                          |          |                                        |       |
| f  | 55 | 44 | I   | 1 | 1 | 10013781 | Oral dryness and saliva altered                                |          |                                        |       |
| f  | 40 | 3  | I   | 1 | 1 | 10013781 | Oral dryness and saliva altered                                |          |                                        |       |
| f  | 40 | 3  | I   | 1 | 1 | 10013781 | Oral dryness and saliva altered                                |          |                                        |       |
| m  | 46 | 2  | I   | 1 | 1 | 10013946 | Dyspeptic signs and symptoms                                   |          |                                        |       |
| m  | 4  | 6  | II  | 1 | 1 | 10014184 | Dermatitis and eczema                                          |          |                                        |       |
| m  | 2  | 1  | I   | 1 | 1 | 10014866 | Gastrointestinal inflammatory disorders NEC                    |          |                                        |       |
| f  | 48 | 5  | II  | 1 | 1 | 10015150 | Erythemas                                                      | 10037087 | Pruritus NEC                           |       |
| m  | 74 | 0  | I   | 1 | 1 | 10015150 | Erythemas                                                      | 10061218 | Inflammations                          |       |
| ND | 5  | 3  | I   | 1 | 1 | 10015958 | Ocular disorders NEC                                           |          |                                        |       |
| f  | 38 | 6  | I   | 2 | 1 | 10016256 | Asthenic conditions                                            |          |                                        |       |
| f  | 47 | 1  | I   | 1 | 1 | 10017999 | Gastrointestinal and abdominal pains (excl<br>oral and throat) |          |                                        |       |
| f  | 36 | 1  | II  | 3 | 1 | 10017999 | Gastrointestinal and abdominal pains (excl<br>oral and throat) |          |                                        |       |
| f  | 36 | 1  | II  | 2 | 1 | 10019211 | Headaches NEC                                                  | 10025482 | Asthenic conditions                    | C,D,E |
| f  | 38 | 7  | II  | 3 | 1 | 10020642 | Apocrine and eccrine gland disorders                           | 10000496 | Acnes                                  |       |
| f  | 74 | 0  | II  | 2 | 1 | 10020751 | Allergic conditions NEC                                        |          |                                        |       |
| f  | 65 | 16 | I   | 2 | 1 | 10020751 | Allergic conditions NEC                                        |          |                                        |       |
| m  | 1  | 5  | I   | 1 | 1 | 10020751 | Allergic conditions NEC                                        | 10055182 | Dermatitis and eczema                  |       |
| f  | 38 | 2  | II  | 1 | 1 | 10020751 | Allergic conditions NEC                                        |          |                                        |       |
| f  | 57 | 1  | III | 1 | 1 | 10020751 | Allergic conditions NEC                                        |          |                                        |       |
| f  | 71 | 5  | I   | 1 | 1 | 10020751 | Allergic conditions NEC                                        |          |                                        |       |
| f  | 45 | 0  | I   | 1 | 1 | 10020751 | Allergic conditions NEC                                        |          |                                        |       |
| f  | 3  | 1  | III | 1 | 1 | 10020993 | Hypoglycaemic conditions NEC                                   |          |                                        |       |
| f  | 48 | ND | II  | 2 | 2 | 10022035 | Disturbances in initiating and maintaining<br>sleep            |          |                                        |       |
| m  | 62 | 7  | III | 1 | 1 | 10025482 | Asthenic conditions                                            | 10007649 | Cardiac disorders NEC                  | F,G   |

|   |    |    |     |   |   |          |                                     |          |                                                           |     |
|---|----|----|-----|---|---|----------|-------------------------------------|----------|-----------------------------------------------------------|-----|
| f | 43 | ND | II  | 1 | 1 | 10025482 | Asthenic conditions                 | 10061224 | Musculoskeletal and connective tissue pain and discomfort |     |
| m | 2  | 5  | I   | 3 | 1 | 10028521 | Pupil disorders                     |          |                                                           |     |
| f | 72 | ND | II  | 1 | 1 | 10028740 | Nasal disorders NEC                 | 10013781 | Oral dryness and saliva altered                           |     |
| f | 9  | 13 | II  | 1 | 1 | 10028813 | Nausea and vomiting symptoms        |          |                                                           |     |
| f | 40 | 19 | II  | 1 | 1 | 10029263 | Dermatitis and eczema               |          |                                                           |     |
| m | 0  | 43 | II  | 1 | 1 | 10030124 | Oedema NEC                          |          |                                                           |     |
| m | 37 | 2  | II  | 1 | 1 | 10033557 | Cardiac signs and symptoms NEC      | 10061224 | Musculoskeletal and connective tissue pain and discomfort |     |
| f | 7  | 3  | III | 1 | 1 | 10033670 | Panic attacks and disorders         |          |                                                           |     |
| f | 2  | 3  | I   | 1 | 1 | 10034545 | Ocular disorders NEC                |          |                                                           |     |
| m | 74 | 41 | II  | 2 | 2 | 10037087 | Pruritus NEC                        | 10015150 | Erythemas                                                 |     |
| m | 6  | 4  | I   | 1 | 1 | 10037087 | Pruritus NEC                        | 10046735 | Urticarias                                                |     |
| m | 28 | 15 | II  | 4 | 1 | 10037087 | Pruritus NEC                        |          |                                                           |     |
| f | 53 | 6  | III | 2 | 1 | 10037660 | Febrile disorders                   | 10013968 | Breathing abnormalities                                   | H,I |
| m | 8  | 7  | II  | 1 | 1 | 10037844 | Rashes, eruptions and exanthems NEC |          |                                                           |     |
| f | 1  | 1  | I   | 1 | 1 | 10037844 | Rashes, eruptions and exanthems NEC |          |                                                           |     |
| f | 1  | 4  | I   | 1 | 1 | 10037844 | Rashes, eruptions and exanthems NEC |          |                                                           |     |
| f | 55 | 1  | I   | 3 | 1 | 10038687 | Breathing abnormalities             |          |                                                           |     |
| f | 45 | 0  | III | 1 | 1 | 10038687 | Breathing abnormalities             | 10033670 | Panic attacks and disorders                               | J,K |
| f | 73 | 2  | I   | 1 | 1 | 10038743 | Increased physical activity levels  |          |                                                           |     |
| m | 55 | 1  | II  | 2 | 1 | 10038743 | Increased physical activity levels  | 10013687 | Dermatitis ascribed to specific agent                     | L   |
| m | 3  | 3  | I   | 1 | 1 | 10038743 | Increased physical activity levels  | 10040984 | Sleep disorders NEC                                       |     |
| f | 30 | 10 | I   | 3 | 1 | 10038743 | Increased physical activity levels  |          |                                                           |     |
| m | 2  | 7  | II  | 1 | 1 | 10038743 | Increased physical activity levels  |          |                                                           |     |
| m | 3  | 3  | I   | 2 | 1 | 10038743 | Increased physical activity levels  |          |                                                           |     |
| m | 1  | 5  | I   | 1 | 1 | 10038743 | Increased physical activity levels  |          |                                                           |     |
| f | 0  | 18 | I   | 1 | 1 | 10038743 | Increased physical activity levels  |          |                                                           |     |
| f | 1  | 1  | II  | 1 | 1 | 10038743 | Increased physical activity levels  |          |                                                           |     |
| f | 3  | 3  | I   | 1 | 1 | 10038743 | Increased physical activity levels  |          |                                                           |     |

|   |    |    |    |   |   |          |                                             |          |                                         |   |
|---|----|----|----|---|---|----------|---------------------------------------------|----------|-----------------------------------------|---|
| m | 3  | 6  | I  | 1 | 1 | 10038743 | Increased physical activity levels          | 10040984 | Sleep disorders NEC                     |   |
| m | 0  | 5  | II | 1 | 1 | 10038743 | Increased physical activity levels          |          |                                         |   |
| m | 1  | 5  | II | 1 | 1 | 10038743 | Increased physical activity levels          |          |                                         |   |
| m | 1  | 3  | II | 1 | 1 | 10038743 | Increased physical activity levels          |          |                                         |   |
| f | 0  | 2  | I  | 1 | 1 | 10038743 | Increased physical activity levels          |          |                                         |   |
| m | 10 | 2  | II | 1 | 1 | 10038743 | Increased physical activity levels          |          |                                         |   |
| f | 77 | 3  | I  | 1 | 1 | 10040849 | Dermal and epidermal conditions NEC         |          |                                         |   |
| f | 44 | 15 | II | 1 | 1 | 10040893 | Dermal and epidermal conditions NEC         |          |                                         |   |
| m | 9  | 4  | I  | 1 | 1 | 10041232 | Upper respiratory tract signs and symptoms  |          |                                         |   |
| f | 78 | 12 | I  | 1 | 1 | 10042868 | Synovial disorders                          |          |                                         |   |
| f | 38 | 14 | I  | 1 | 1 | 10043949 | Tongue signs and symptoms                   | 10000059 | Gastrointestinal signs and symptoms NEC | M |
| f | 40 | 27 | I  | 1 | 1 | 10044032 | Dental surface disorders                    |          |                                         |   |
| f | 44 | 2  | II | 4 | 1 | 10046735 | Urticarias                                  |          |                                         |   |
| f | 2  | 1  | II | 1 | 1 | 10046735 | Urticarias                                  |          |                                         |   |
| f | 0  | 1  | I  | 1 | 1 | 10046735 | Urticarias                                  |          |                                         |   |
| f | 1  | 3  | I  | 1 | 2 | 10046735 | Urticarias                                  |          |                                         |   |
| m | 7  | 5  | II | 1 | 1 | 10047700 | Nausea and vomiting symptoms                |          |                                         |   |
| f | 50 | ND | II | 1 | 1 | 10049044 | Skin structures and soft tissue infections  |          |                                         |   |
| f | 51 | 2  | I  | 3 | 1 | 10052137 | Ear disorders NEC                           |          |                                         |   |
| f | 51 | 9  | I  | 1 | 1 | 10053424 | Application and instillation site reactions | 10015150 | Erythemas                               |   |
| f | 35 | 2  | I  | 1 | 1 | 10061305 | Nasal disorders NEC                         |          |                                         |   |
| m | 0  | 5  | I  | 1 | 1 | 10068172 | Anal and rectal signs and symptoms          | 10014184 | Dermatitis and eczema                   |   |
| m | 36 | 5  | I  | 1 | 1 | 10074859 | Faecal abnormalities NEC                    | 10000059 | Gastrointestinal signs and symptoms NEC |   |

*Intensity: I = Grade I (mild); II = Grade II (moderate); III = Grade III (severe). Outcome: 1 = recovered; 2 = not yet recovered. Management: 1 = drug withdrawal; 2 = dose reduction; 3 = no precautions; 4 = no data. MedDRA: Medical Dictionary for Regulatory Activities. NEC: not elsewhere classified. ND: No data.*

*Symptoms 3-5 in Online Resource 4, consecutively ordered (A-M)*

| <b>A-M</b> | <b>MedDRA Code</b> | <b>Text</b>                                 |
|------------|--------------------|---------------------------------------------|
| A          | 10038687           | Breathing abnormalities                     |
| B          | 10021097           | Vascular hypotensive disorders              |
| C          | 10037087           | Pruritus NEC                                |
| D          | 10053424           | Application and instillation site reactions |
| E          | 10015150           | Erythemas                                   |
| F          | 10000059           | Gastrointestinal signs and symptoms NEC     |
| G          | 10020910           | Breathing abnormalities                     |
| H          | 10022000           | Influenza viral infections                  |
| I          | 10019211           | Headaches NEC                               |
| J          | 10033775           | Paraesthesias and dysaesthesias             |
| K          | 10002855           | Anxiety symptoms                            |
| L          | 10007649           | Cardiac disorders NEC                       |
| M          | 10016256           | Asthenic conditions                         |

**Online Resource 3 Indications for prescriptions of anthroposophic vs. non-anthroposophic medicinal products in adults, most frequent diagnosis chapters of the International Classification of Diseases, Tenth Revision**

| Chapter                                 | Code    | Text                                                                                    | AMPs    |         | Non-AMPs |         |
|-----------------------------------------|---------|-----------------------------------------------------------------------------------------|---------|---------|----------|---------|
|                                         |         |                                                                                         | N       | Percent | N        | Percent |
| XIII                                    | M00–M99 | Diseases of the musculoskeletal system and connective tissue                            | 13,404  | 11.6%   | 17,250   | 10.8%   |
| X                                       | J00–J99 | Diseases of the respiratory system                                                      | 13,314  | 11.6%   | 14,681   | 9.2%    |
| II                                      | C00–D48 | Neoplasms                                                                               | 12,703  | 11.0%   | 13,827   | 8.6%    |
| IX                                      | I00–I99 | Diseases of the circulatory system                                                      | 11,904  | 10.3%   | 25,408   | 15.8%   |
| V                                       | F00–F99 | Mental and behavioural disorders                                                        | 9,749   | 8.5%    | 13,047   | 8.1%    |
| IV                                      | E00–E90 | Endocrine, nutritional and metabolic diseases                                           | 8,943   | 7.8%    | 18,484   | 11.5%   |
| XI                                      | K00–K93 | Diseases of the digestive system                                                        | 7,867   | 6.8%    | 10,856   | 6.8%    |
| XVIII                                   | R00–R99 | Symptoms, signs and abnormal clinical and laboratory findings, not elsewhere classified | 6,414   | 5.6%    | 7,704    | 4.8%    |
| XII                                     | L00–L99 | Diseases of the skin and subcutaneous tissue                                            | 6,021   | 5.2%    | 7,015    | 4.4%    |
| Other chapters (with <5% in each group) |         |                                                                                         | 24,738  | 21.5%   | 32,050   | 20.0%   |
| Total evaluable diagnoses               |         |                                                                                         | 115,057 | 100.0%  | 160,322  | 100.0%  |

*AMPs: Anthroposophic medicinal products. Non-AMPs: all other medicinal products.*



**Online Resource 4 Indications for prescriptions of anthroposophic vs. non-anthroposophic medicinal products in children, most frequent diagnosis chapters of the International Classification of Diseases, Tenth Revision**

| Chapter                                 | Code    | Text                                                                                    | AMPs    |         | Non-AMPs |         |
|-----------------------------------------|---------|-----------------------------------------------------------------------------------------|---------|---------|----------|---------|
|                                         |         |                                                                                         | N       | Percent | N        | Percent |
| X                                       | J00–J99 | Diseases of the respiratory system                                                      | 61,127  | 32.4%   | 74,714   | 31.4%   |
| I                                       | A00–B99 | Certain infectious and parasitic diseases                                               | 18,689  | 9.9%    | 31,078   | 13.1%   |
| XVIII                                   | R00–R99 | Symptoms, signs and abnormal clinical and laboratory findings, not elsewhere classified | 18,485  | 9.8%    | 24,343   | 10.2%   |
| XXI                                     | Z00–Z99 | Factors influencing health status and contact with health services                      | 14,795  | 7.8%    | 18,798   | 7.9%    |
| XII                                     | L00–L99 | Diseases of the skin and subcutaneous tissue                                            | 13,622  | 7.2%    | 17,004   | 7.2%    |
| VIII                                    | H60–H95 | Diseases of the ear and mastoid process                                                 | 11,601  | 6.1%    | 11,350   | 4.8%    |
| XI                                      | K00–K93 | Diseases of the digestive system                                                        | 10,080  | 5.3%    | 15,057   | 6.3%    |
| Other chapters (with <5% in each group) |         |                                                                                         | 40,269  | 21.3%   | 45,429   | 19.1%   |
| Total evaluable diagnoses               |         |                                                                                         | 188,668 | 100.0%  | 237,773  | 100.0%  |

*AMPs: Anthroposophic medicinal products. Non-AMPs: all other medicinal products.*

### Online Resource 5 Features of adverse drug reactions to anthroposophic medicinal products vs. all other medicinal products, respectively. Patients of all physicians

| Item                              | ADR to AMPs (n = 100) |         | ADR to Non-AMPs (n = 682) |         | P-value  |
|-----------------------------------|-----------------------|---------|---------------------------|---------|----------|
|                                   | N                     | Percent | N                         | Percent |          |
| <b>Serious ADR</b>                | 1/100                 | 1.0%    | 29/682                    | 4.3%    | 0.1609*  |
| <b>Severity of ADR</b>            |                       |         |                           |         | 0.0000** |
| Grade I                           | 50/100                | 50.0%   | 139/680                   | 20.4%   |          |
| Grade II                          | 43/100                | 43.0%   | 459/680                   | 67.5%   |          |
| Grade III                         | 7/100                 | 7.0%    | 78/680                    | 11.5%   |          |
| Grade IV                          | 0/100                 | 0.0%    | 4/680                     | 0.6%    |          |
| <b>Number of symptoms per ADR</b> |                       |         |                           |         | 0.1056** |
| 1                                 | 74/100                | 74.0%   | 551/682                   | 80.8%   |          |
| 2                                 | 18/100                | 18.0%   | 97/682                    | 14.2%   |          |
| ≥3                                | 8/100                 | 8.0%    | 34/682                    | 5.0%    |          |
| <b>Occurrence of ADR</b>          |                       |         |                           |         | 0.0000** |
| Once                              | 17/100                | 17.0%   | 60/671                    | 8.9%    |          |
| Several times                     | 40/100                | 40.0%   | 78/671                    | 11.6%   |          |
| Continuous                        | 43/100                | 43.0%   | 533/671                   | 79.4%   |          |
| <b>Duration of ADR</b>            |                       |         |                           |         | 0.1341** |
| <24h                              | 4/94                  | 4.3%    | 32/639                    | 5.0%    |          |
| 1-2 days                          | 28/94                 | 29.8%   | 194/639                   | 30.4%   |          |
| 3-6 days                          | 34/94                 | 36.2%   | 291/639                   | 45.5%   |          |
| 7-13 days                         | 10/94                 | 10.6%   | 58/639                    | 9.1%    |          |
| ≥14 days                          | 18/94                 | 19.1%   | 64/639                    | 10.0%   |          |
| <b>Management of ADR</b>          |                       |         |                           |         | 0.0000** |
| Drug withdrawal                   | 78/97                 | 80.4%   | 351/621                   | 56.5%   |          |
| Dose reduction                    | 11/97                 | 11.3%   | 12/621                    | 1.9%    |          |
| No precautions                    | 8/97                  | 8.2%    | 258/621                   | 41.5%   |          |
| <b>Outcome of ADR</b>             |                       |         |                           |         | 0.5289*  |
| Recovered                         | 95/100                | 95.0%   | 618/666                   | 92.8%   |          |
| Not yet recovered                 | 5/100                 | 5.0%    | 48/666                    | 7.2%    |          |

The analyses reflect the relative frequency of ADR features within each MP group (not the absolute frequencies) and are based on the ADRs with evaluable data for the respective feature. AMPs: Anthroposophic medicinal products. Non-AMPs: all other medicinal products. \*Fisher's Exact Test. \*\*Mann-Whitney U Test.

**Online Resource 6 Frequency of adverse drug reactions to anthroposophic medicinal products in relation to prescriptions in patients with respiratory and ear infections (ICD-10 H66-H67, H70, H72, J00, J02-J06, J20, J40): patients of prescriber physicians in EvaMed vs. the AM Group of IIPCOS**

| <b>Study</b>                                    | <b>EvaMed (this study)</b> | <b>IIPCOS, AM Group</b> |
|-------------------------------------------------|----------------------------|-------------------------|
| Confirmed ADRs to AMPs, all Grades              | 23                         | 2                       |
| Patients with confirmed ADR                     | 23                         | 2                       |
| Patients with prescriptions                     | 6,743                      | 715                     |
| Patients with ADRs to AMPs / with prescriptions | 0.34%                      | 0.28%                   |

*AMPs: Anthroposophic medicinal products. Non-AMPs: all other medicinal products. ADRs: Adverse drug reactions. EvaMed: Evaluation of Anthroposophic Medicine. IIPCOS, AM Group: International Integrative Primary Care Outcomes Study, patients treated by physicians offering anthroposophic treatment.*

**Online Resource 7 Adverse drug reactions to anthroposophic medicinal products in adult patients of prescriber physicians in EvaMed vs. AMOS patients enrolled 1 Jan 1999 to 31 March 2001\*, samples restricted for age group (18-75 years)\*\* and ICD-10 Diagnosis Blocks\*\*\***

| Study                                               | EvaMed (this study) | AMOS  |
|-----------------------------------------------------|---------------------|-------|
| Patients with confirmed ADRs to AMPs                | 20                  | 13    |
| Patients using AMPs                                 | 2,900               | 422   |
| Proportion of AMP users with confirmed ADRs to AMPs | 0.69%               | 3.08% |

*EvaMed: Evaluation of Anthroposophic Medicine. AMOS: Anthroposophic Medicine Outcomes Study. ADRs: Adverse drug reactions. AMPs: Anthroposophic medicinal products.*

*\*AMOS patients enrolled 1 Jan 1999 to 31 March 2001: For AMOS patients enrolled 1 April 2001 and later, reports of suspected ADRs were not subject to detailed causality assessment; hence these patients were not included in the present comparison.*

*\*\*Age group: AMOS had an upper age limit of 75 years, EvaMed had no upper age limit. Therefore both samples were restricted to patients aged 18-75 years.*

*\*\*\*ICD-10 Diagnosis Blocks: EvaMed comprised patients with any diagnosis, AMOS comprised patients with any chronic condition. The AMOS sample was restricted to ICD-10 Diagnosis Blocks with at least 5 Patients (83.8% of the sample, n=422/501 patients, 21 Diagnosis Blocks), the EvaMed sample was restricted to the same 21 Diagnosis Blocks: C00-C75 Malignant neoplasms, stated or presumed to be primary, of specified sites, except of lymphoid, haematopoietic and related tissue; D10-D36 Benign neoplasms; D80-D89 Certain disorders involving the immune mechanism; E00-E07 Disorders of thyroid gland; F30-F39 Mood [affective] disorders; F40-F48 Neurotic, stress-related and somatoform disorders; G35-G37 Demyelinating diseases of the central nervous system; G40-G47 Episodic and paroxysmal disorders; G90-G99 Other disorders of the nervous system; I10-I15 Hypertensive diseases; I30-I52 Other forms of heart disease; J30-J39 Other diseases of upper respiratory tract; J40-J47 Chronic lower respiratory diseases; K20-K31 Diseases of oesophagus, stomach and duodenum; K50-K52 Noninfective enteritis and colitis; L20-L30 Dermatitis and eczema; M00-M25 Arthropathies; M40-M54 Dorsopathies; M60-M79 Soft tissue disorders; N80-N98 Noninflammatory disorders of female genital tract; R50-R69 General symptoms and signs.*
